# Supplementary material for: Urban Beetle Diversity in Natural History Collections—A Hundred-Year Perspective
Source: MDPI journal article supplement (doi:10.3390/d15121224), 2023-12-18
Supplement: s1 [file s1]

## Supplementary Materials

**Table S1.** List of species according to recent nomenclature found in the Central Beetles Collection together with Korlević Collection and the Redenšek Beetles Collection of the Croatian Natural History Museum.

| Family       | Species                                                |
|--------------|--------------------------------------------------------|
| Anthicidae   | <i>Anthelephila pedestris</i> (Rossi, 1790)            |
| Anthicidae   | <i>Anthicus antherinus</i> (Linnaeus, 1760)            |
| Anthicidae   | <i>Hirticollis hispidus</i> (Rossi, 1792)              |
| Anthicidae   | <i>Notoxus brachycerus</i> (Faldermann, 1837)          |
| Anthicidae   | <i>Omonadus floralis</i> (Linnaeus, 1758)              |
| Anthribidae  | <i>Anthribus nebulosus</i> (Forster & J.R., 1770)      |
| Anthribidae  | <i>Platyrhinus resinosus</i> (Scopoli & J.A., 1763)    |
| Anthribidae  | <i>Platystomos albinus</i> (Linnaeus, 1758)            |
| Anthribidae  | <i>Tropideres albirostris</i> (Schoenherr, 1823)       |
| Attelabidae  | <i>Attelabus nitens</i> (Voss, 1925)                   |
| Attelabidae  | <i>Rhynchites bacchus</i> (Stephens, 1839)             |
| Attelabidae  | <i>Rhynchites pubescens</i> (J.C.Fabricius, 1775)      |
| Bostrichidae | <i>Bostrichus capucinus</i> (Linnaeus, 1758)           |
| Buprestidae  | <i>Agrilus angustulus</i> (Illiger, 1803)              |
| Buprestidae  | <i>Agrilus hastulifer</i> (Ratzeburg, 1837)            |
| Buprestidae  | <i>Agrilus integerrimus</i> (Ratzeburg, 1837)          |
| Buprestidae  | <i>Agrilus laticornis</i> (Illiger, 1803)              |
| Buprestidae  | <i>Anthaxia cichorii</i> (Olivier, 1790)               |
| Buprestidae  | <i>Anthaxia nitidula</i> (Linnaeus, 1758)              |
| Buprestidae  | <i>Anthaxia podolica</i> (Mannerheim, 1837)            |
| Buprestidae  | <i>Anthaxia quadripunctata</i> (Linnaeus, 1758)        |
| Buprestidae  | <i>Anthaxia salicis</i> (Fabricius, 1776)              |
| Buprestidae  | <i>Chrysobothris affinis</i> (Fabricius, 1794)         |
| Buprestidae  | <i>Coraebus elatus</i> (Fabricius, 1787)               |
| Buprestidae  | <i>Lamprodila mirifica</i> (Mulsant, 1855)             |
| Buprestidae  | <i>Trachys minutus</i> (Linnaeus, 1758)                |
| Byrrhidae    | <i>Byrrhus pilula</i> (Linnaeus, 1758)                 |
| Byrrhidae    | <i>Curimopsis paleata</i> (Erichson, 1846)             |
| Byrrhidae    | <i>Cytilus sericeus</i> (Forster, 1771)                |
| Byrrhidae    | <i>Pedilophorus auratus</i> (Duftschmid, 1825)         |
| Byturidae    | <i>Byturus ochraceus</i> (Scriba, 1790)                |
| Byturidae    | <i>Byturus tomentosus</i> (De Geer, 1774)              |
| Byturidae    | <i>Lamprobyrrhulus nitidus</i> (Schaller, 1783)        |
| Cantharidae  | <i>Ancistronycha erichsonii</i> (Bach, 1854)           |
| Cantharidae  | <i>Cantharis obscura</i> (Linnaeus, 1758)              |
| Cantharidae  | <i>Cantharis paludosa</i> (Fallén, 1807)               |
| Cantharidae  | <i>Cantharis rufa</i> (Linnaeus, 1758)                 |
| Cantharidae  | <i>Cordicantharis longicollis</i> (Kiesenwetter, 1859) |

| Family      | Species                                                    |
|-------------|------------------------------------------------------------|
| Cantharidae | <i>Malthodes fuscus</i> (Waltl, 1838)                      |
| Cantharidae | <i>Metacantharis clypeata</i> (Illiger, 1798)              |
| Cantharidae | <i>Rhagonycha elongata</i> (Fallén, 1807)                  |
| Carabidae   | <i>Abax parallelepipedus</i> (Piller & Mitterpacher, 1783) |
| Carabidae   | <i>Abax parallelus</i> (Duftschmid, 1812)                  |
| Carabidae   | <i>Acupalpus flavicollis</i> (Sturm, 1825)                 |
| Carabidae   | <i>Acupalpus meridianus</i> (Linnaeus, 1760)               |
| Carabidae   | <i>Agonum thoreyi</i> (Dejean, 1828)                       |
| Carabidae   | <i>Agonum viduum</i> (Panzer, 1796)                        |
| Carabidae   | <i>Amara aenea</i> (DeGeer, 1774)                          |
| Carabidae   | <i>Amara famelica</i> (Zimmermann, 1832)                   |
| Carabidae   | <i>Amara lucida</i> (Duftschmid, 1812)                     |
| Carabidae   | <i>Amara nitida</i> (Sturm, 1825)                          |
| Carabidae   | <i>Amara tricuspidata</i> (Dejean, 1831)                   |
| Carabidae   | <i>Anisodactylus signatus</i> (Panzer, 1796)               |
| Carabidae   | <i>Anophthalmus kaufmanni</i> (Ganglbauer, 1900)           |
| Carabidae   | <i>Asaphidion caraboides</i> (Schränk, 1781)               |
| Carabidae   | <i>Asaphidion flavipes</i> (Linnaeus, 1760)                |
| Carabidae   | <i>Badister unipustulatus</i> (Bonelli, 1813)              |
| Carabidae   | <i>Bembidion andreae</i> (Fabricius, 1787)                 |
| Carabidae   | <i>Bembidion articulatum</i> (Panzer, 1796)                |
| Carabidae   | <i>Bembidion assimile</i> (Gyllenhal, 1810)                |
| Carabidae   | <i>Bembidion decorum</i> (Panzer, 1799)                    |
| Carabidae   | <i>Bembidion deletum</i> (Audinet-Serville, 1821)          |
| Carabidae   | <i>Bembidion dentellum</i> (Thunberg, 1787)                |
| Carabidae   | <i>Bembidion foraminosum</i> (Sturm, 1825)                 |
| Carabidae   | <i>Bembidion lampros</i> (Herbst, 1784)                    |
| Carabidae   | <i>Bembidion minimum</i> (Fabricius, 1792)                 |
| Carabidae   | <i>Bembidion modestum</i> (Fabricius, 1801)                |
| Carabidae   | <i>Bembidion obliquum</i> (Sturm, 1825)                    |
| Carabidae   | <i>Bembidion octomaculatum</i> (Goeze, 1777)               |
| Carabidae   | <i>Bembidion punctulatum</i> (Drapiez, 1820)               |
| Carabidae   | <i>Bembidion pygmaeum</i> (Fabricius, 1792)                |
| Carabidae   | <i>Bembidion quadrimaculatum</i> (Linnaeus, 1760)          |
| Carabidae   | <i>Bembidion quadripustulatum</i> (Audinet-Serville, 1821) |
| Carabidae   | <i>Bembidion saxatile</i> (Gyllenhal, 1827)                |
| Carabidae   | <i>Bembidion semipunctatum</i> (Donovan, 1806)             |
| Carabidae   | <i>Bembidion splendidum</i> (Sturm, 1825)                  |
| Carabidae   | <i>Bembidion testaceum</i> (Duftschmid, 1812)              |
| Carabidae   | <i>Bembidion varium</i> (G.A.Olivier, 1795)                |
| Carabidae   | <i>Brachinus crepitans</i> (Linnaeus, 1758)                |
| Carabidae   | <i>Brachinus explodens</i> (Duftschmid, 1812)              |

| Family    | Species                                                 |
|-----------|---------------------------------------------------------|
| Carabidae | <i>Calathus melanocephalus</i> (Linnaeus, 1758)         |
| Carabidae | <i>Calosoma inquisitor</i> (Linnaeus, 1758)             |
| Carabidae | <i>Carabus convexus</i> (Fabricius, 1775)               |
| Carabidae | <i>Carabus coriaceus</i> (Linnaeus, 1758)               |
| Carabidae | <i>Carabus gigas</i> (Creutzer, 1799)                   |
| Carabidae | <i>Carabus granulatus</i> (Linnaeus, 1758)              |
| Carabidae | <i>Carabus intricatus</i> (Linnaeus, 1760)              |
| Carabidae | <i>Carabus nemoralis</i> (O.F.Müller, 1764)             |
| Carabidae | <i>Chlaenius nitidulus</i> (Schränk, 1781)              |
| Carabidae | <i>Cicindela campestris</i> (Linnaeus, 1758)            |
| Carabidae | <i>Cicindela sylvicola</i> (Dejean, 1822)               |
| Carabidae | <i>Cychrus attenuatus</i> (Fabricius, 1792)             |
| Carabidae | <i>Diachromus germanus</i> (Linnaeus, 1758)             |
| Carabidae | <i>Dyschirius nitidus</i> (Dejean, 1825)                |
| Carabidae | <i>Dyschirius pusillus</i> (Dejean, 1825)               |
| Carabidae | <i>Dyschirius rufipes</i> (Dejean, 1825)                |
| Carabidae | <i>Elaphrus riparius</i> (Linnaeus, 1758)               |
| Carabidae | <i>Epaphius secalis</i> (Paykull, 1790)                 |
| Carabidae | <i>Gynandromorphus etruscus</i> (Quensel, 1806)         |
| Carabidae | <i>Harpalus atratus</i> (Latreille, 1804)               |
| Carabidae | <i>Harpalus distinguendus</i> (Duftschmid, 1812)        |
| Carabidae | <i>Harpalus griseus</i> (Panzer, 1796)                  |
| Carabidae | <i>Harpalus honestus</i> (Duftschmid, 1812)             |
| Carabidae | <i>Harpalus pumilus</i> (Sturm, 1818)                   |
| Carabidae | <i>Harpalus rubripes</i> (Duftschmid, 1812)             |
| Carabidae | <i>Harpalus rufipes</i> (DeGeer, 1774)                  |
| Carabidae | <i>Harpalus tardus</i> (Panzer, 1796)                   |
| Carabidae | <i>Lebia cyanocephala</i> (Linnaeus, 1758)              |
| Carabidae | <i>Lionychus quadrillum</i> (Duftschmid, 1812)          |
| Carabidae | <i>Microlestes maurus</i> (Sturm, 1827)                 |
| Carabidae | <i>Microlestes minutulus</i> (Goeze, 1777)              |
| Carabidae | <i>Omophron limbatum</i> (Fabricius, 1777)              |
| Carabidae | <i>Parophonus maculicornis</i> (Duftschmid, 1812)       |
| Carabidae | <i>Pterostichus cursorius</i> (Dejean, 1828)            |
| Carabidae | <i>Pterostichus fasciatopunctatus</i> (Creutzer, 1799)  |
| Carabidae | <i>Pterostichus oblongopunctatus</i> (Fabricius, 1787)  |
| Carabidae | <i>Pterostichus striatopunctatus</i> (Duftschmid, 1812) |
| Carabidae | <i>Pterostichus transversalis</i> (Duftschmid, 1812)    |
| Carabidae | <i>Stenolophus teutonus</i> (Schränk, 1781)             |
| Carabidae | <i>Syntomus obscuroguttatus</i> (Duftschmid, 1812)      |
| Carabidae | <i>Tachys bistriatus</i> (Duftschmid, 1812)             |
| Carabidae | <i>Trechus rubens</i> (Fabricius, 1792)                 |

| Family       | Species                                             |
|--------------|-----------------------------------------------------|
| Cerambycidae | <i>Aegomorphus clavipes</i> (Schränk, 1781)         |
| Cerambycidae | <i>Aegosoma scabricorne</i> (Scopoli, 1763)         |
| Cerambycidae | <i>Agapanthia villosoviridescens</i> (Degeer, 1775) |
| Cerambycidae | <i>Alosterna tabacicolor</i> (Degeer, 1775)         |
| Cerambycidae | <i>Anaglyptus mysticus</i> (Linnaeus, 1758)         |
| Cerambycidae | <i>Anastrangalia dubia</i> (Scopoli, 1763)          |
| Cerambycidae | <i>Anastrangalia sanguinolenta</i> (Linnaeus, 1761) |
| Cerambycidae | <i>Anoplodera rufipes</i> (Schaller, 1783)          |
| Cerambycidae | <i>Anoplodera sexguttata</i> (Fabricius, 1775)      |
| Cerambycidae | <i>Arhopalus rusticus</i> (Linnaeus, 1758)          |
| Cerambycidae | <i>Aromia moschata</i> (Linnaeus, 1758)             |
| Cerambycidae | <i>Asemum striatum</i> (Linnaeus, 1758)             |
| Cerambycidae | <i>Axinopalpis gracilis</i> (Krynicky, 1832)        |
| Cerambycidae | <i>Brachyta bifasciata</i> (Olivier, 1792)          |
| Cerambycidae | <i>Callidium violaceum</i> (Linnaeus, 1758)         |
| Cerambycidae | <i>Callimus angulatus</i> (Schränk, 1789)           |
| Cerambycidae | <i>Cerambyx cerdo</i> (Linnaeus, 1758)              |
| Cerambycidae | <i>Cerambyx miles</i> (Bonelli, 1823)               |
| Cerambycidae | <i>Cerambyx nodulosus</i> (Germar, 1817)            |
| Cerambycidae | <i>Cerambyx scopolii</i> (Fuesslin, 1775)           |
| Cerambycidae | <i>Chlorophorus figuratus</i> (Scopoli, 1763)       |
| Cerambycidae | <i>Chlorophorus sartor</i> (Müller, 1766)           |
| Cerambycidae | <i>Chlorophorus varius</i> (Müller, 1766)           |
| Cerambycidae | <i>Clytus arietis</i> (Linnaeus, 1758)              |
| Cerambycidae | <i>Clytus rhamni</i> (Germar, 1817)                 |
| Cerambycidae | <i>Cortodera femorata</i> (Fabricius, 1787)         |
| Cerambycidae | <i>Cortodera holosericea</i> (Fabricius, 1801)      |
| Cerambycidae | <i>Cortodera humeralis</i> (Schaller, 1783)         |
| Cerambycidae | <i>Cotyachryson cinereus</i> (Blanchard, 1851)      |
| Cerambycidae | <i>Deilus fugax</i> (Olivier, 1790)                 |
| Cerambycidae | <i>Dinoptera collaris</i> (Linnaeus, 1758)          |
| Cerambycidae | <i>Dorcadion arenarium</i> (Scopoli, 1763)          |
| Cerambycidae | <i>Dorcadion pedestre</i> (Poda, 1761)              |
| Cerambycidae | <i>Ergates faber</i> (Linnaeus, 1761)               |
| Cerambycidae | <i>Evodinus clathratus</i> (Fabricius, 1793)        |
| Cerambycidae | <i>Exocentrus adspersus</i> (Mulsant, 1846)         |
| Cerambycidae | <i>Gaurotes virginea</i> (Linnaeus, 1758)           |
| Cerambycidae | <i>Grammoptera abdominalis</i> (Stephens, 1831)     |
| Cerambycidae | <i>Grammoptera ruficornis</i> (Fabricius, 1781)     |
| Cerambycidae | <i>Grammoptera ustulata</i> (Schaller, 1783)        |
| Cerambycidae | <i>Herophila tristis</i> (Linnaeus, 1767)           |
| Cerambycidae | <i>Hylotrupes bajulus</i> (Linnaeus, 1758)          |

| Family       | Species                                                      |
|--------------|--------------------------------------------------------------|
| Cerambycidae | <i>Judolia sexmaculata</i> (Linnaeus, 1758)                  |
| Cerambycidae | <i>Lamia textor</i> (Linnaeus, 1758)                         |
| Cerambycidae | <i>Leiopus nebulosus</i> (Linnaeus, 1758)                    |
| Cerambycidae | <i>Leptura aethiops</i> (Poda, 1761)                         |
| Cerambycidae | <i>Leptura annularis</i> (Fabricius, 1801)                   |
| Cerambycidae | <i>Leptura aurulenta</i> (Fabricius, 1793)                   |
| Cerambycidae | <i>Leptura quadrifasciata</i> (Linnaeus, 1758)               |
| Cerambycidae | <i>Mesosa nebulosa</i> (Fabricius, 1781)                     |
| Cerambycidae | <i>Molorchus minor</i> (Linnaeus, 1758)                      |
| Cerambycidae | <i>Monochamus sartor</i> (Fabricius, 1787)                   |
| Cerambycidae | <i>Monochamus sutor</i> (Linnaeus, 1758)                     |
| Cerambycidae | <i>Morimus funereus</i> (Mulsant, 1862)                      |
| Cerambycidae | <i>Oberea linearis</i> (Linnaeus, 1761)                      |
| Cerambycidae | <i>Oberea oculata</i> (Linnaeus, 1758)                       |
| Cerambycidae | <i>Oberea pedemontana</i> (Chevrolat, 1856)                  |
| Cerambycidae | <i>Opsilia molybdaena</i> (Vives & Alonso-Zarazaga, 2000)    |
| Cerambycidae | <i>Oxymirus cursor</i> (Linnaeus, 1758)                      |
| Cerambycidae | <i>Pachyta quadrimaculata</i> (Linnaeus, 1758)               |
| Cerambycidae | <i>Pachytodes cerambyciformis</i> (Schränk, 1781)            |
| Cerambycidae | <i>Pachytodes erraticus</i> (Dalman, 1817)                   |
| Cerambycidae | <i>Paracorymbia fulva</i> (Degeer, 1775)                     |
| Cerambycidae | <i>Parmena balteus</i> (Linnaeus, 1767)                      |
| Cerambycidae | <i>Pedostrangalia revestita</i> (Linnaeus, 1767)             |
| Cerambycidae | <i>Pedostrangalia verticalis</i> (Germar, 1822)              |
| Cerambycidae | <i>Phymatodes rufipes</i> (Fabricius, 1776)                  |
| Cerambycidae | <i>Phymatodes testaceus</i> (Linnaeus, 1758)                 |
| Cerambycidae | <i>Phytoecia affinis</i> (Harrer, 1784)                      |
| Cerambycidae | <i>Phytoecia argus</i> (Frölich, 1793)                       |
| Cerambycidae | <i>Phytoecia cylindrica</i> (Linnaeus, 1758)                 |
| Cerambycidae | <i>Phytoecia icterica</i> (Schaller, 1783)                   |
| Cerambycidae | <i>Phytoecia pustulata</i> (Schränk, 1776)                   |
| Cerambycidae | <i>Pidonia lurida</i> (Fabricius, 1793)                      |
| Cerambycidae | <i>Plagionotus arcuatus</i> (Linnaeus, 1758)                 |
| Cerambycidae | <i>Plagionotus detritus</i> (Linnaeus, 1758)                 |
| Cerambycidae | <i>Poecilium alni</i> (Linnaeus, 1767)                       |
| Cerambycidae | <i>Poecilium pusillus</i> (Fabricius, 1787)                  |
| Cerambycidae | <i>Pogonocherus fasciculatus</i> (Degeer, 1775)              |
| Cerambycidae | <i>Pogonocherus hispidulus</i> (Piller & Mitterpacher, 1783) |
| Cerambycidae | <i>Pogonocherus hispidus</i> (Linnaeus, 1758)                |
| Cerambycidae | <i>Pogonocherus ovatus</i> (Goeze, 1777)                     |
| Cerambycidae | <i>Prionus coriarius</i> (Linnaeus, 1758)                    |
| Cerambycidae | <i>Pseudovadonia livida</i> (Fabricius, 1776)                |

| Family        | Species                                                      |
|---------------|--------------------------------------------------------------|
| Cerambycidae  | <i>Purpuricenus kaehleri</i> (Linnaeus, 1758)                |
| Cerambycidae  | <i>Pyrrhidium sanguineum</i> (Linnaeus, 1758)                |
| Cerambycidae  | <i>Rhagium bifasciatum</i> (Fabricius, 1775)                 |
| Cerambycidae  | <i>Rhagium inquisitor</i> (Linnaeus, 1758)                   |
| Cerambycidae  | <i>Rhagium mordax</i> (Degeer, 1775)                         |
| Cerambycidae  | <i>Rhagium sycophanta</i> (Schränk, 1781)                    |
| Cerambycidae  | <i>Rhamnusium bicolor</i> (Schränk, 1781)                    |
| Cerambycidae  | <i>Ropalopus clavipes</i> (Fabricius, 1775)                  |
| Cerambycidae  | <i>Ropalopus macropus</i> (Germar, 1824)                     |
| Cerambycidae  | <i>Ropalopus ungaricus</i> (Herbst, 1784)                    |
| Cerambycidae  | <i>Rosalia alpina</i> (Linnaeus, 1758)                       |
| Cerambycidae  | <i>Rutpela maculata</i> (Poda von Neuhaus, 1761)             |
| Cerambycidae  | <i>Saphanus piceus</i> (Laicharting, 1784)                   |
| Cerambycidae  | <i>Semanotus undatus</i> (Linnaeus, 1758)                    |
| Cerambycidae  | <i>Spondylis buprestoides</i> (Linnaeus, 1758)               |
| Cerambycidae  | <i>Stenocorus meridianus</i> (Linnaeus, 1758)                |
| Cerambycidae  | <i>Stenopterus rufus</i> (Linnaeus, 1767)                    |
| Cerambycidae  | <i>Stenostola dubia</i> (Laicharting, 1784)                  |
| Cerambycidae  | <i>Stenurella bifasciata</i> (Müller, 1776)                  |
| Cerambycidae  | <i>Stenurella melanura</i> (Linnaeus, 1758)                  |
| Cerambycidae  | <i>Stenurella nigra</i> (Linnaeus, 1758)                     |
| Cerambycidae  | <i>Stenurella septempunctata</i> (Fabricius, 1793)           |
| Cerambycidae  | <i>Stictoleptura cordigera</i> (Fuesslin, 1775)              |
| Cerambycidae  | <i>Stictoleptura erythroptera</i> (Hagenbach, 1822)          |
| Cerambycidae  | <i>Stictoleptura maculicornis</i> (Sautière & Jacquot, 2006) |
| Cerambycidae  | <i>Stictoleptura rubra</i> (Linnaeus, 1758)                  |
| Cerambycidae  | <i>Stictoleptura scutellata</i> (Fabricius, 1781)            |
| Cerambycidae  | <i>Strangalia attenuata</i> (Linnaeus, 1758)                 |
| Cerambycidae  | <i>Tetrops praeustus</i> (Linnaeus, 1758)                    |
| Cerambycidae  | <i>Vadonia unipunctata</i> (Fabricius, 1787)                 |
| Cerambycidae  | <i>Vesperus luridus</i> (Rossi, 1794)                        |
| Cerambycidae  | <i>Xylotrechus rusticus</i> (Linnaeus, 1758)                 |
| Chrysomelidae | <i>Agelastica alni</i> (Linnaeus, 1758)                      |
| Chrysomelidae | <i>Altica helianthemii</i> (Allard, 1859)                    |
| Chrysomelidae | <i>Altica quercetorum</i> (Foudras, 1860)                    |
| Chrysomelidae | <i>Bromius obscurus</i> (Linnaeus, 1758)                     |
| Chrysomelidae | <i>Bruchidius cisti</i> (Fabricius, 1775)                    |
| Chrysomelidae | <i>Bruchus atomarius</i> (Linnaeus, 1761)                    |
| Chrysomelidae | <i>Calomicrus circumfusus</i> (Marsham, 1802)                |
| Chrysomelidae | <i>Cassida murraea</i> (Linnaeus, 1767)                      |
| Chrysomelidae | <i>Cassida nebulosa</i> (Linnaeus, 1758)                     |
| Chrysomelidae | <i>Cassida nobilis</i> (Linnaeus, 1758)                      |

| Family        | Species                                                |
|---------------|--------------------------------------------------------|
| Chrysomelidae | <i>Cassida vibex</i> (Linnaeus, 1767)                  |
| Chrysomelidae | <i>Cassida viridis</i> (Linnaeus, 1758)                |
| Chrysomelidae | <i>Chaetocnema concinna</i> (Marsham, 1802)            |
| Chrysomelidae | <i>Chaetocnema hortensis</i> (Geoffroy, 1785)          |
| Chrysomelidae | <i>Chaetocnema semicoerulea</i> (Koch, 1803)           |
| Chrysomelidae | <i>Chrysochus asclepiadeus</i> (Pallas, 1776)          |
| Chrysomelidae | <i>Chrysolina fastuosa</i> (Scopoli, 1763)             |
| Chrysomelidae | <i>Chrysolina globosa</i> (Panzer, 1805)               |
| Chrysomelidae | <i>Chrysolina marginata</i> (Linnaeus, 1758)           |
| Chrysomelidae | <i>Chrysolina purpurascens</i> (Germar, 1822)          |
| Chrysomelidae | <i>Chrysolina sanguinolenta</i> (Linnaeus, 1758)       |
| Chrysomelidae | <i>Chrysolina sturmi</i> (Westhoff, 1882)              |
| Chrysomelidae | <i>Chrysomela populi</i> (Linnaeus, 1758)              |
| Chrysomelidae | <i>Chrysomela saliceti</i> (Weise, 1884)               |
| Chrysomelidae | <i>Crepidodera aurata</i> (Marsham, 1802)              |
| Chrysomelidae | <i>Crepidodera aurea</i> (Geoffroy, 1785)              |
| Chrysomelidae | <i>Crepidodera fulvicornis</i> (Fabricius, 1792)       |
| Chrysomelidae | <i>Crepidodera lamina</i> (Bedel, 1901)                |
| Chrysomelidae | <i>Cryptocephalus anticus</i> (Suffrian, 1848)         |
| Chrysomelidae | <i>Cryptocephalus biguttatus</i> (Scopoli, 1763)       |
| Chrysomelidae | <i>Cryptocephalus bipunctatus</i> (Linnaeus, 1758)     |
| Chrysomelidae | <i>Cryptocephalus elegantulus</i> (Gravenhorst, 1807)  |
| Chrysomelidae | <i>Cryptocephalus exiguus</i> (Schneider, 1792)        |
| Chrysomelidae | <i>Cryptocephalus flavipes</i> (Fabricius, 1781)       |
| Chrysomelidae | <i>Cryptocephalus hypochaeridis</i> (Linnaeus, 1758)   |
| Chrysomelidae | <i>Cryptocephalus moraei</i> (Linnaeus, 1758)          |
| Chrysomelidae | <i>Cryptocephalus ocellatus</i> (Drapiez, 1819)        |
| Chrysomelidae | <i>Cryptocephalus pygmaeus</i> (Fabricius, 1792)       |
| Chrysomelidae | <i>Cryptocephalus quinquepunctatus</i> (Scopoli, 1763) |
| Chrysomelidae | <i>Cryptocephalus rufipes</i> (Goeze, 1777)            |
| Chrysomelidae | <i>Cryptocephalus violaceus</i> (Laicharting, 1781)    |
| Chrysomelidae | <i>Diorhabda elongata</i> (Brullé, 1832)               |
| Chrysomelidae | <i>Epitrix atropae</i> (Foudras, 1860)                 |
| Chrysomelidae | <i>Galeruca melanocephala</i> (Ponza, 1805)            |
| Chrysomelidae | <i>Galeruca rufa</i> (Germar, 1824)                    |
| Chrysomelidae | <i>Galeruca tanaceti</i> (Linnaeus, 1758)              |
| Chrysomelidae | <i>Gastrophysa polygoni</i> (Linnaeus, 1758)           |
| Chrysomelidae | <i>Gonioctena fornicata</i> (Brüggemann, 1873)         |
| Chrysomelidae | <i>Hermaphysa mercurialis</i> (Fabricius, 1792)        |
| Chrysomelidae | <i>Hispa atra</i> (Linnaeus, 1767)                     |
| Chrysomelidae | <i>Labidostomis cyanicornis</i> (Germar, 1822)         |
| Chrysomelidae | <i>Labidostomis humeralis</i> (Schneider, 1792)        |

| Family        | Species                                                 |
|---------------|---------------------------------------------------------|
| Chrysomelidae | <i>Labidostomis longimana</i> (Linnaeus, 1761)          |
| Chrysomelidae | <i>Labidostomis tridentata</i> (Linnaeus, 1758)         |
| Chrysomelidae | <i>Leptinotarsa decemlineata</i> (Say, 1824)            |
| Chrysomelidae | <i>Liliocercis merdigera</i> (Linnaeus, 1758)           |
| Chrysomelidae | <i>Longitarsus linnaei</i> (Duftschmid, 1825)           |
| Chrysomelidae | <i>Luperus xanthopoda</i> (Schrank, 1781)               |
| Chrysomelidae | <i>Oulema melanopus</i> (Linnaeus, 1758)                |
| Chrysomelidae | <i>Pachnophorus tessellatus</i> (Duftschmid, 1825)      |
| Chrysomelidae | <i>Pachybrachis hieroglyphicus</i> (Laicharting, 1781)  |
| Chrysomelidae | <i>Phratora vulgatissima</i> (Linnaeus, 1758)           |
| Chrysomelidae | <i>Phyllotreta armoraciae</i> (Koch, 1803)              |
| Chrysomelidae | <i>Phyllotreta cruciferae</i> (Goeze, 1777)             |
| Chrysomelidae | <i>Phyllotreta ochripes</i> (Curtis, 1837)              |
| Chrysomelidae | <i>Phyllotreta striolata</i> (Fabricius, 1801)          |
| Chrysomelidae | <i>Phyllotreta undulata</i> (Kutschera, 1860)           |
| Chrysomelidae | <i>Plagioderma versicolora</i> (Laicharting, 1781)      |
| Chrysomelidae | <i>Plateumaris consimilis</i> (Schrank, 1781)           |
| Chrysomelidae | <i>Prasocuris phellandrii</i> (Linnaeus, 1758)          |
| Chrysomelidae | <i>Psylliodes affinis</i> (Paykull, 1799)               |
| Chrysomelidae | <i>Psylliodes attenuata</i> (Koch, 1803)                |
| Chrysomelidae | <i>Smaragdina affinis</i> (Illiger, 1794)               |
| Chrysomelidae | <i>Smaragdina aurita</i> (Linnaeus, 1767)               |
| Chrysomelidae | <i>Smaragdina salicina</i> (Scopoli, 1763)              |
| Chrysomelidae | <i>Smaragdina xanthaspis</i> (Germar, 1824)             |
| Chrysomelidae | <i>Timarcha metallica</i> (Laicharting, 1781)           |
| Ciidae        | <i>Cis boleti</i> (Scopoli, 1763)                       |
| Cleridae      | <i>Korynetes caeruleus</i> (De Geer, 1775)              |
| Cleridae      | <i>Opilo domesticus</i> (Sturm, 1837)                   |
| Cleridae      | <i>Tillus elongatus</i> (Linnaeus, 1758)                |
| Cleridae      | <i>Trichodes faviarius</i> (Illiger, 1802)              |
| Coccinellidae | <i>Adalia bipunctata</i> (Linnaeus, 1758)               |
| Coccinellidae | <i>Adalia decempunctata</i> (Linnaeus, 1758)            |
| Coccinellidae | <i>Aphidecta oblitterata</i> (Linnaeus, 1758)           |
| Coccinellidae | <i>Calvia decemguttata</i> (Linnaeus, 1767)             |
| Coccinellidae | <i>Calvia quatuordecimguttata</i> (Linnaeus, 1758)      |
| Coccinellidae | <i>Ceratomegilla undecimnotata</i> (Schneider, 1792)    |
| Coccinellidae | <i>Chilocorus bipustulatus</i> (Linnaeus, 1758)         |
| Coccinellidae | <i>Coccinella magnifica</i> (Redtenbacher, 1843)        |
| Coccinellidae | <i>Coccinella septempunctata</i> (Linnaeus, 1758)       |
| Coccinellidae | <i>Coccinula quatuordecimpustulata</i> (Linnaeus, 1758) |
| Coccinellidae | <i>Cynegetis impunctata</i> (Linnaeus, 1758)            |
| Coccinellidae | <i>Exochomus quadripustulatus</i> (Linnaeus, 1758)      |



| Family         | Species                                               |
|----------------|-------------------------------------------------------|
| Coccinellidae  | <i>Halyzia sedecimguttata</i> (Linnaeus, 1758)        |
| Coccinellidae  | <i>Hippodamia variegata</i> (Goeze, 1777)             |
| Coccinellidae  | <i>Hyperaspis reppensis</i> (Herbst, 1783)            |
| Coccinellidae  | <i>Myzia oblongoguttata</i> (Linnaeus, 1758)          |
| Coccinellidae  | <i>Nephus quadrimaculatus</i> (Herbst, 1783)          |
| Coccinellidae  | <i>Oenopia conglobata</i> (Linnaeus, 1758)            |
| Coccinellidae  | <i>Platynaspis luteorubra</i> (Goeze, 1777)           |
| Coccinellidae  | <i>Propylea quatuordecimpunctata</i> (Linnaeus, 1758) |
| Coccinellidae  | <i>Psyllobora vigintiduopunctata</i> (Linnaeus, 1758) |
| Coccinellidae  | <i>Scymnus frontalis</i> (Fabricius, 1787)            |
| Coccinellidae  | <i>Scymnus rubromaculatus</i> (Goeze, 1777)           |
| Coccinellidae  | <i>Tytthaspis sedecimpunctata</i> (Linnaeus, 1758)    |
| Coccinellidae  | <i>Vibidia duodecimguttata</i> (Poda, 1761)           |
| Cryptophagidae | <i>Antherophagus pallens</i> (Linnaeus, 1758)         |
| Cryptophagidae | <i>Cryptophagus distinguendus</i> (Sturm, 1845)       |
| Curculionidae  | <i>Cionus tuberculosus</i> (Scopoli & J.A., 1763)     |
| Curculionidae  | <i>Curculio nucum</i> (Linnaeus, 1758)                |
| Curculionidae  | <i>Curculio venosus</i> (Gravenhorst, 1807)           |
| Curculionidae  | <i>Dodecastichus inflatus</i> (Gyllenhal, 1834)       |
| Curculionidae  | <i>Glocianus maculaalba</i> (Herbst, 1795)            |
| Curculionidae  | <i>Hylesinus fraxini</i> (Panzer, 1799)               |
| Curculionidae  | <i>Liparus glabirostris</i> (Kuster, 1849)            |
| Curculionidae  | <i>Sitophilus oryzae</i> (Schoenherr, 1838)           |
| Dascillidae    | <i>Dascillus cervinus</i> (Linnaeus, 1758)            |
| Dermestidae    | <i>Anthrenus pimpinellae</i> (Fabricius, 1775)        |
| Dermestidae    | <i>Anthrenus scrophulariae</i> (Linnaeus, 1758)       |
| Dermestidae    | <i>Attagenus pantherinus</i> (Ahrens, 1814)           |
| Dermestidae    | <i>Attagenus pellio</i> (Linnaeus, 1758)              |
| Dermestidae    | <i>Attagenus punctatus</i> (Scopoli, 1772)            |
| Dermestidae    | <i>Attagenus unicolor</i> (Brahm, 1791)               |
| Dermestidae    | <i>Dermestes bicolor</i> (Fabricius, 1781)            |
| Dermestidae    | <i>Dermestes frischii</i> (Kugelann, 1792)            |
| Dermestidae    | <i>Dermestes lanarius</i> (Illiger, 1801)             |
| Dermestidae    | <i>Dermestes lardarius</i> (Linnaeus, 1758)           |
| Dermestidae    | <i>Dermestes undulatus</i> (Brahm, 1790)              |
| Dryophthoridae | <i>Sitophilus granarius</i> (C.Linnaeus, 1758)        |
| Dryopidae      | <i>Dryops auriculatus</i> (Geoffroy, 1785)            |
| Dryopidae      | <i>Dryops ernesti</i> (Des Gozis, 1886)               |
| Dryopidae      | <i>Dryops luridus</i> (Erichson, 1847)                |
| Dryopidae      | <i>Pomatinus substriatus</i> (Müller, 1806)           |
| Dytiscidae     | <i>Hydaticus transversalis</i> (Pontoppidan, 1763)    |
| Dytiscidae     | <i>Hydroglyphus geminus</i> (Fabricius, 1792)         |

| Family     | Species                                                |
|------------|--------------------------------------------------------|
| Dytiscidae | <i>Hydroporus memnonius</i> (Nicolai, 1822)            |
| Dytiscidae | <i>Hydroporus planus</i> (Fabricius, 1782)             |
| Dytiscidae | <i>Porhydrus lineatus</i> (Fabricius, 1775)            |
| Elateridae | <i>Actenicerus sjaelandicus</i> (Müller, 1764)         |
| Elateridae | <i>Adrastus montanus</i> (Scopoli, 1763)               |
| Elateridae | <i>Adrastus pallens</i> (Fabricius, 1792)              |
| Elateridae | <i>Adrastus rachifer</i> (Geoffroy, 1785)              |
| Elateridae | <i>Agriotes acuminatus</i> (Stephens, 1830)            |
| Elateridae | <i>Agriotes lineatus</i> (Linnaeus, 1767)              |
| Elateridae | <i>Agriotes obscurus</i> (Linnaeus, 1758)              |
| Elateridae | <i>Agriotes pilosellus</i> (Schönherr, 1817)           |
| Elateridae | <i>Agriotes sputator</i> (Linnaeus, 1758)              |
| Elateridae | <i>Agriotes ustulatus</i> (Schaller, 1783)             |
| Elateridae | <i>Agrypnus murinus</i> (Linnaeus, 1758)               |
| Elateridae | <i>Ampedus balteatus</i> (Linnaeus, 1758)              |
| Elateridae | <i>Ampedus cinnabarinus</i> (Eschscholtz, 1829)        |
| Elateridae | <i>Ampedus elongatulus</i> (Fabricius, 1787)           |
| Elateridae | <i>Ampedus erythrogonus</i> (Müller, 1821)             |
| Elateridae | <i>Ampedus nigrinus</i> (Herbst, 1784)                 |
| Elateridae | <i>Ampedus pomonae</i> (Stephens, 1830)                |
| Elateridae | <i>Ampedus pomorum</i> (Herbst, 1784)                  |
| Elateridae | <i>Ampedus praeustus</i> (Fabricius, 1792)             |
| Elateridae | <i>Ampedus rufipennis</i> (Stephens, 1830)             |
| Elateridae | <i>Ampedus sanguineus</i> (Linnaeus, 1758)             |
| Elateridae | <i>Ampedus sanguinolentus</i> (Schränk, 1776)          |
| Elateridae | <i>Ampedus sinuatus</i> Germar, 1844                   |
| Elateridae | <i>Anostirus castaneus</i> (Linnaeus, 1758)            |
| Elateridae | <i>Anostirus purpureus</i> (Poda, 1761)                |
| Elateridae | <i>Athous austriacus</i> (Desbrochers des Loges, 1873) |
| Elateridae | <i>Athous bicolor</i> (Goeze, 1777)                    |
| Elateridae | <i>Athous haemorrhoidalis</i> (Fabricius, 1801)        |
| Elateridae | <i>Athous jejunos</i> (Kiesenwetter, 1858)             |
| Elateridae | <i>Athous subfuscus</i> (Müller, 1764)                 |
| Elateridae | <i>Athous vittatus</i> (Fabricius, 1792)               |
| Elateridae | <i>Betarmon bisbimaculatus</i> (Fabricius, 1803)       |
| Elateridae | <i>Calambus bipustulatus</i> (Linnaeus, 1767)          |
| Elateridae | <i>Cardiophorus gramineus</i> (Scopoli, 1763)          |
| Elateridae | <i>Cardiophorus ruficollis</i> (Linnaeus, 1758)        |
| Elateridae | <i>Cidnopus pilosus</i> (Leske, 1785)                  |
| Elateridae | <i>Ctenicera pectinicornis</i> (Linnaeus, 1758)        |
| Elateridae | <i>Ctenicera virens</i> (Schränk, 1781)                |
| Elateridae | <i>Dalopius marginatus</i> (Linnaeus, 1758)            |

| Family       | Species                                         |
|--------------|-------------------------------------------------|
| Elateridae   | <i>Denticollis linearis</i> (Linnaeus, 1758)    |
| Elateridae   | <i>Dicronychus cinereus</i> (Herbst, 1784)      |
| Elateridae   | <i>Dicronychus equiseti</i> (Herbst, 1784)      |
| Elateridae   | <i>Drapetes mordelloides</i> (Host, 1789)       |
| Elateridae   | <i>Drasterius bimaculatus</i> (Rossi, 1790)     |
| Elateridae   | <i>Elater ferrugineus</i> (Linnaeus, 1758)      |
| Elateridae   | <i>Hemicrepidius hirtus</i> (Herbst, 1784)      |
| Elateridae   | <i>Hemicrepidius niger</i> (Linnaeus, 1758)     |
| Elateridae   | <i>Ischnodes sanguinicollis</i> (Panzer, 1793)  |
| Elateridae   | <i>Lacon punctatus</i> (Herbst, 1779)           |
| Elateridae   | <i>Melanotus castanipes</i> (Paykull, 1800)     |
| Elateridae   | <i>Melanotus crassicollis</i> (Erichson, 1841)  |
| Elateridae   | <i>Melanotus punctolineatus</i> (Pelerin, 1829) |
| Elateridae   | <i>Negastrius pulchellus</i> (Linnaeus, 1761)   |
| Elateridae   | <i>Nothodes parvulus</i> (Panzer, 1799)         |
| Elateridae   | <i>Pheletes quercus</i> (Olivier, 1790)         |
| Elateridae   | <i>Procræus tibialis</i> (Lacordaire, 1835)     |
| Elateridae   | <i>Prosternon tessellatum</i> (Linnaeus, 1758)  |
| Elateridae   | <i>Quasimus minutissimus</i> (Germar, 1823)     |
| Elateridae   | <i>Selatosomus aeneus</i> (Linnaeus, 1758)      |
| Elateridae   | <i>Selatosomus confluens</i> (Gebler, 1829)     |
| Elateridae   | <i>Selatosomus cruciatus</i> (Linnaeus, 1758)   |
| Elateridae   | <i>Selatosomus latus</i> (Fabricius, 1801)      |
| Elateridae   | <i>Stenagostus rhombeus</i> (Olivier, 1790)     |
| Elateridae   | <i>Synaptus filiformis</i> (Fabricius, 1781)    |
| Elateridae   | <i>Zorochros dermestoides</i> (Herbst, 1806)    |
| Elmidae      | <i>Elmis maugetii</i> (Latreille, 1802)         |
| Elmidae      | <i>Limnius perrisi</i> (Dufour, 1843)           |
| Endomychidae | <i>Endomychus coccineus</i> (Linnaeus, 1758)    |
| Erotylidae   | <i>Dacne bipustulata</i> (Thunberg, 1781)       |
| Erotylidae   | <i>Dacne rufifrons</i> (Fabricius, 1775)        |
| Erotylidae   | <i>Triplax aenea</i> (Schaller, 1783)           |
| Erotylidae   | <i>Triplax elongata</i> (Lacordaire, 1842)      |
| Erotylidae   | <i>Triplax rufipes</i> (Fabricius, 1787)        |
| Erotylidae   | <i>Triplax russica</i> (Linnaeus, 1758)         |
| Erotylidae   | <i>Tritoma bipustulata</i> (Fabricius, 1775)    |
| Geotrupidae  | <i>Anoplotrupes stercorosus</i> (Scriba, 1791)  |
| Geotrupidae  | <i>Geotrupes mutator</i> (Marsham, 1802)        |
| Halipilidae  | <i>Peltodytes caesus</i> (Duftschmid, 1805)     |
| Helophoridae | <i>Helophorus aquaticus</i> (Linnaeus, 1758)    |
| Helophoridae | <i>Helophorus griseus</i> (Herbst, 1793)        |
| Helophoridae | <i>Helophorus nubilus</i> (Fabricius, 1777)     |

| Family        | Species                                              |
|---------------|------------------------------------------------------|
| Heteroceridae | <i>Augyles sericans</i> (Kiesenwetter, 1843)         |
| Heteroceridae | <i>Heterocerus fenestratus</i> (Thunberg, 1784)      |
| Heteroceridae | <i>Heterocerus flexuosus</i> (Stephens, 1828)        |
| Heteroceridae | <i>Heterocerus fossor</i> (Kiesenwetter, 1843)       |
| Heteroceridae | <i>Heterocerus fuscus</i> (Kiesenwetter, 1843)       |
| Heteroceridae | <i>Heterocerus marginatus</i> (Fabricius, 1787)      |
| Heteroceridae | <i>Heterocerus obsoletus</i> (Curtis, 1828)          |
| Histeridae    | <i>Atholus corvinus</i> (Germar, 1817)               |
| Histeridae    | <i>Chalcionellus decemstriatus</i> (P.Rossi, 1792)   |
| Histeridae    | <i>Haeterius ferrugineus</i> (Olivier, 1789)         |
| Histeridae    | <i>Hister quadrimaculatus</i> (Linnaeus, 1758)       |
| Histeridae    | <i>Hister quadrinotatus</i> (Scriba, 1790)           |
| Histeridae    | <i>Margarinotus bipustulatus</i> (Schränk, 1781)     |
| Histeridae    | <i>Margarinotus brunneus</i> (Fabricius, 1775)       |
| Histeridae    | <i>Margarinotus obscurus</i> (Kugelann, 1792)        |
| Histeridae    | <i>Margarinotus punctiventer</i> (Marseul, 1854)     |
| Histeridae    | <i>Margarinotus purpurascens</i> (Herbst, 1791)      |
| Histeridae    | <i>Platysoma angustatum</i> (Hoffmann, 1803)         |
| Hydraenidae   | <i>Hydraena riparia</i> (Kugelann, 1794)             |
| Hydraenidae   | <i>Ochthebius minimus</i> (Fabricius, 1792)          |
| Hydrophilidae | <i>Berosus signaticollis</i> (T.Charpentier, 1825)   |
| Hydrophilidae | <i>Limnoxenus niger</i> (Gmelin, 1790)               |
| Hydrophilidae | <i>Sphaeridium bipustulatum</i> (Fabricius, 1781)    |
| Leiodidae     | <i>Scioldrepoides fumatus</i> (Spence, 1813)         |
| Lucanidae     | <i>Aesalus scarabaeoides</i> (Panzer, 1793)          |
| Lucanidae     | <i>Ceruchus chrysomelinus</i> (Hochenwarth, 1785)    |
| Lucanidae     | <i>Dorcus parallelipedus</i> (Linnaeus, 1758)        |
| Lucanidae     | <i>Lucanus cervus</i> (Linnaeus, 1758)               |
| Lucanidae     | <i>Platycerus caraboides</i> (Linnaeus, 1758)        |
| Lucanidae     | <i>Sinodendron cylindricum</i> (Linnaeus, 1758)      |
| Malachiidae   | <i>Axinotarsus pulicarius</i> (Fabricius, 1777)      |
| Malachiidae   | <i>Axinotarsus ruficollis</i> (Olivier, 1790)        |
| Malachiidae   | <i>Malachius aeneus</i> (Linnaeus, 1761)             |
| Malachiidae   | <i>Malachius bipustulatus</i> (Linnaeus, 1758)       |
| Melandryidae  | <i>Serropalpus barbatus</i> (Schaller, 1783)         |
| Meloidae      | <i>Lytta vesicatoria</i> (Linnaeus, 1758)            |
| Meloidae      | <i>Meloe brevicollis</i> (Panzer, 1793)              |
| Meloidae      | <i>Meloe cicatricosus</i> (Leach, 1815)              |
| Meloidae      | <i>Meloe proscarabaeus</i> (Linnaeus, 1758)          |
| Meloidae      | <i>Meloe rugosus</i> (Marsham, 1802)                 |
| Meloidae      | <i>Meloe scabriusculus</i> (Brandt & Erichson, 1832) |
| Meloidae      | <i>Meloe violaceus</i> (Marsham, 1802)               |

| Family         | Species                                               |
|----------------|-------------------------------------------------------|
| Monotomidae    | <i>Rhizophagus perforatus</i> (Erichson, 1845)        |
| Mycetophagidae | <i>Mycetophagus multipunctatus</i> (Fabricius, 1792)  |
| Mycetophagidae | <i>Mycetophagus quadripustulatus</i> (Linnaeus, 1761) |
| Nitidulidae    | <i>Astylogethes subrugosus</i> (Gyllenhal, 1808)      |
| Nitidulidae    | <i>Carpophilus hemipterus</i> (Linnaeus, 1758)        |
| Nitidulidae    | <i>Epuraea aestiva</i> (Linnaeus, 1758)               |
| Nitidulidae    | <i>Epuraea marseuli</i> (Reitter, 1873)               |
| Nitidulidae    | <i>Epuraea terminalis</i> (Mannerheim, 1843)          |
| Nitidulidae    | <i>Meligethes denticulatus</i> (Heer, 1841)           |
| Nitidulidae    | <i>Meligethes pedicularius</i> (Gyllenhal, 1808)      |
| Nitidulidae    | <i>Meligethes ruficornis</i> (LeConte, 1859)          |
| Nitidulidae    | <i>Meligethes umbrosus</i> (Sturm, 1845)              |
| Nitidulidae    | <i>Omosita discoidea</i> (Fabricius, 1775)            |
| Nitidulidae    | <i>Pocadius ferrugineus</i> (Fabricius, 1775)         |
| Nitidulidae    | <i>Xerogethes discoideus</i> (Erichson, 1845)         |
| Nosodendridae  | <i>Nosodendron fasciculare</i> (Olivier, 1790)        |
| Oedemeridae    | <i>Ischnomera sanguinicollis</i> (Fabricius, 1787)    |
| Oedemeridae    | <i>Oedemera femorata</i> (Scopoli, 1763)              |
| Oedemeridae    | <i>Oedemera lurida</i> (Marsham, 1802)                |
| Oedemeridae    | <i>Oedemera podagrariae</i> (Linnaeus, 1767)          |
| Oedemeridae    | <i>Oedemera pthysica</i> (Scopoli, 1763)              |
| Oedemeridae    | <i>Oedemera virescens</i> (Linnaeus, 1767)            |
| Ptinidae       | <i>Xestobium austriacum</i> (Reitter, 1890)           |
| Pyrochroidae   | <i>Pyrochroa coccinea</i> (Linnaeus, 1761)            |
| Salpingidae    | <i>Salpingus ruficollis</i> (Linnaeus, 1761)          |
| Salpingidae    | <i>Vincenzellus ruficollis</i> (Panzer, 1794)         |
| Scarabaeidae   | <i>Acanthobodilus immundus</i> (Creutzer, 1799)       |
| Scarabaeidae   | <i>Amphimallon assimile</i> (Herbst, 1790)            |
| Scarabaeidae   | <i>Amphimallon ruficorne</i> (Fabricius, 1775)        |
| Scarabaeidae   | <i>Amphimallon solstitiale</i> (Linnaeus, 1758)       |
| Scarabaeidae   | <i>Anisoplia tempestiva</i> (Erichson, 1848)          |
| Scarabaeidae   | <i>Anomala dubia</i> (Scopoli, 1763)                  |
| Scarabaeidae   | <i>Anomala vitis</i> (Fabricius, 1775)                |
| Scarabaeidae   | <i>Anoxia orientalis</i> (Krynicky, 1832)             |
| Scarabaeidae   | <i>Anoxia pilosa</i> (Fabricius, 1792)                |
| Scarabaeidae   | <i>Aphodius alpinus</i> (Drapiez, 1819)               |
| Scarabaeidae   | <i>Aphodius ater</i> (De Geer, 1774)                  |
| Scarabaeidae   | <i>Aphodius bimaculatus</i> (Laxman, 1770)            |
| Scarabaeidae   | <i>Aphodius consputus</i> (Creutzer, 1799)            |
| Scarabaeidae   | <i>Aphodius depressus</i> (Kugelann, 1792)            |
| Scarabaeidae   | <i>Aphodius distinctus</i> (Müller, 1776)             |
| Scarabaeidae   | <i>Aphodius erraticus</i> (Linnaeus, 1758)            |

| Family       | Species                                          |
|--------------|--------------------------------------------------|
| Scarabaeidae | <i>Aphodius fimetarius</i> (Linnaeus, 1758)      |
| Scarabaeidae | <i>Aphodius fossor</i> (Linnaeus, 1758)          |
| Scarabaeidae | <i>Aphodius granarius</i> (Linnaeus, 1767)       |
| Scarabaeidae | <i>Aphodius haemorrhoidalis</i> (Linnaeus, 1758) |
| Scarabaeidae | <i>Aphodius immundus</i> (Creutzer, 1799)        |
| Scarabaeidae | <i>Aphodius lividus</i> (Olivier, 1789)          |
| Scarabaeidae | <i>Aphodius luridus</i> (Fabricius, 1775)        |
| Scarabaeidae | <i>Aphodius merdarius</i> (Fabricius, 1775)      |
| Scarabaeidae | <i>Aphodius obliteratedus</i> (Panzer, 1823)     |
| Scarabaeidae | <i>Aphodius prodromus</i> (Brahm, 1790)          |
| Scarabaeidae | <i>Aphodius pubescens</i> (Sturm, 1800)          |
| Scarabaeidae | <i>Aphodius punctatosulcatus</i> (Sturm, 1805)   |
| Scarabaeidae | <i>Aphodius pusillus</i> (Herbst, 1789)          |
| Scarabaeidae | <i>Aphodius rufescens</i> (Fabricius, 1801)      |
| Scarabaeidae | <i>Aphodius rufipes</i> (Linnaeus, 1758)         |
| Scarabaeidae | <i>Aphodius satellitus</i> (Herbst, 1789)        |
| Scarabaeidae | <i>Aphodius sticticus</i> (Panzer, 1798)         |
| Scarabaeidae | <i>Aphodius subterraneus</i> (Linnaeus, 1758)    |
| Scarabaeidae | <i>Aphodius varians</i> (Duftschmid, 1805)       |
| Scarabaeidae | <i>Aplidia transversa</i> (Fabricius, 1801)      |
| Scarabaeidae | <i>Caccobius schreberi</i> (Linnaeus, 1767)      |
| Scarabaeidae | <i>Cetonia aurata</i> (Linnaeus, 1758)           |
| Scarabaeidae | <i>Chilothorax distinctus</i> (Müller, 1776)     |
| Scarabaeidae | <i>Copris lunaris</i> (Linnaeus, 1758)           |
| Scarabaeidae | <i>Elaphocera dalmatina</i> (Motschulsky, 1859)  |
| Scarabaeidae | <i>Euoniticellus fulvus</i> (Goeze, 1777)        |
| Scarabaeidae | <i>Firminus lautiusculus</i> (Schaufuss, 1864)   |
| Scarabaeidae | <i>Gnorimus nobilis</i> (Linnaeus, 1758)         |
| Scarabaeidae | <i>Gnorimus variabilis</i> (Linnaeus, 1758)      |
| Scarabaeidae | <i>Holochelus aequinoctialis</i> (Herbst, 1790)  |
| Scarabaeidae | <i>Hoplia argentea</i> (Poda, 1761)              |
| Scarabaeidae | <i>Hoplia philanthus</i> (Fuessly, 1775)         |
| Scarabaeidae | <i>Hoplia praticola</i> (Duftschmidt, 1805)      |
| Scarabaeidae | <i>Hymenoplia chevrolati</i> (Mulsant, 1842)     |
| Scarabaeidae | <i>Maladera holosericea</i> (Scopoli, 1772)      |
| Scarabaeidae | <i>Melolontha albida</i> (Fivaldszky, 1835)      |
| Scarabaeidae | <i>Melolontha hippocastani</i> (Fabricius, 1801) |
| Scarabaeidae | <i>Melolontha melolontha</i> (Linnaeus, 1758)    |
| Scarabaeidae | <i>Miltotrogus vernus</i> (Germar, 1823)         |
| Scarabaeidae | <i>Mimela aurata</i> (Fabricius, 1801)           |
| Scarabaeidae | <i>Omaloplia ruricola</i> (Fabricius, 1775)      |
| Scarabaeidae | <i>Onthophagus furcatus</i> (Fabricius, 1781)    |

| Family       | Species                                              |
|--------------|------------------------------------------------------|
| Scarabaeidae | <i>Onthophagus lemur</i> (Fabricius, 1781)           |
| Scarabaeidae | <i>Onthophagus nuchicornis</i> (Linnaeus, 1758)      |
| Scarabaeidae | <i>Onthophagus ovatus</i> (Linnaeus, 1767)           |
| Scarabaeidae | <i>Onthophagus taurus</i> (Schreber, 1759)           |
| Scarabaeidae | <i>Onthophagus vacca</i> (Linnaeus, 1767)            |
| Scarabaeidae | <i>Onthophagus verticicornis</i> (Laicharting, 1781) |
| Scarabaeidae | <i>Onthophagus vitulus</i> (Fabricius, 1776)         |
| Scarabaeidae | <i>Oryctes nasicornis</i> (Linnaeus, 1758)           |
| Scarabaeidae | <i>Osmoderma eremita</i> (Scopoli, 1763)             |
| Scarabaeidae | <i>Oxyomus sylvestris</i> (Scopoli, 1763)            |
| Scarabaeidae | <i>Oxythyrea funesta</i> (Poda, 1761)                |
| Scarabaeidae | <i>Phyllopertha horticola</i> (Linnaeus, 1758)       |
| Scarabaeidae | <i>Pleurophorus caesus</i> (Panzer, 1796)            |
| Scarabaeidae | <i>Polyphylla fullo</i> (Linnaeus, 1758)             |
| Scarabaeidae | <i>Protaetia aeruginosa</i> (Linnaeus, 1767)         |
| Scarabaeidae | <i>Protaetia affinis</i> (Andersch, 1797)            |
| Scarabaeidae | <i>Protaetia cuprea</i> (Fabricius, 1775)            |
| Scarabaeidae | <i>Protaetia fieberi</i> (Kraatz, 1880)              |
| Scarabaeidae | <i>Protaetia lugubris</i> (Herbst, 1786)             |
| Scarabaeidae | <i>Protaetia speciosissima</i> (Scopoli, 1786)       |
| Scarabaeidae | <i>Psammodius asper</i> (Fabricius, 1775)            |
| Scarabaeidae | <i>Rhizotrogus aestivus</i> (Olivier, 1789)          |
| Scarabaeidae | <i>Serica brunnea</i> (Linnaeus, 1758)               |
| Scarabaeidae | <i>Sisyphus schaefferi</i> (Linnaeus, 1758)          |
| Scarabaeidae | <i>Trichius abdominalis</i> (Ménétrières, 1832)      |
| Scarabaeidae | <i>Trichius fasciatus</i> (Linnaeus, 1758)           |
| Scarabaeidae | <i>Trichius rosaceus</i> (Voet, 1769)                |
| Scarabaeidae | <i>Tropinota hirta</i> (Poda, 1761)                  |
| Scarabaeidae | <i>Tropinota squalida</i> (Scopoli, 1763)            |
| Scarabaeidae | <i>Valgus hemipterus</i> (Linnaeus, 1758)            |
| Scirtidae    | <i>Elodes marginata</i> (Fabricius, 1798)            |
| Scaptiidae   | <i>Anaspis thoracica</i> (Linnaeus, 1758)            |
| Silphidae    | <i>Ablattaria laevigata</i> (Fabricius, 1775)        |
| Silphidae    | <i>Aclypea undata</i> (Müller & O.F., 1776)          |
| Silphidae    | <i>Necrodes littoralis</i> (Linnaeus, 1758)          |
| Silphidae    | <i>Nicrophorus humator</i> (Gleditsch, 1767)         |
| Silphidae    | <i>Nicrophorus interruptus</i> (Stephens, 1830)      |
| Silphidae    | <i>Nicrophorus vespilloides</i> (Herbst, 1783)       |
| Silphidae    | <i>Oiceoptoma thoracicum</i> (Linnaeus, 1758)        |
| Silphidae    | <i>Silpha obscura</i> (Linnaeus, 1758)               |
| Silphidae    | <i>Thanatophilus rugosus</i> (Linnaeus, 1758)        |
| Silphidae    | <i>Thanatophilus sinuatus</i> (Fabricius, 1775)      |

| Family        | Species                                             |
|---------------|-----------------------------------------------------|
| Silvanidae    | <i>Silvanus unidentatus</i> (Olivier, 1790)         |
| Staphylinidae | <i>Abemus chloropterus</i> (Creutzer, 1796)         |
| Staphylinidae | <i>Amphichroum canaliculatum</i> (Erichson, 1840)   |
| Staphylinidae | <i>Anotylus rugosus</i> (Fabricius, 1775)           |
| Staphylinidae | <i>Aploderus caelatus</i> (Gravenhorst, 1802)       |
| Staphylinidae | <i>Atheta spelaea</i> (Erichson, 1839)              |
| Staphylinidae | <i>Atrecus affinis</i> (Paykull, 1789)              |
| Staphylinidae | <i>Autalia impressa</i> (Olivier & A.G., 1795)      |
| Staphylinidae | <i>Bolitochara pulchra</i> (Gravenhorst, 1806)      |
| Staphylinidae | <i>Brachygluta haematica</i> (Reichenbach, 1816)    |
| Staphylinidae | <i>Creophilus maxillosus</i> (Linnaeus, 1758)       |
| Staphylinidae | <i>Deleaster dichrous</i> (Gravenhorst, 1802)       |
| Staphylinidae | <i>Dinothenarus chrysocomus</i> (Mannerheim, 1830)  |
| Staphylinidae | <i>Eusphalerum longipenne</i> (Erichson, 1839)      |
| Staphylinidae | <i>Eusphalerum tenenbaumi</i> (Bernhauer, 1932)     |
| Staphylinidae | <i>Haploglossa pulla</i> (Gyllenhal, 1827)          |
| Staphylinidae | <i>Hypnogyra angularis</i> (Ganglbauer, 1895)       |
| Staphylinidae | <i>Lesteva pubescens</i> (Mannerheim, 1830)         |
| Staphylinidae | <i>Nicrophorus investigator</i> (Zetterstedt, 1824) |
| Staphylinidae | <i>Ocypus olens</i> (Müller & O.F., 1764)           |
| Staphylinidae | <i>Ontholestes murinus</i> (Linnaeus, 1758)         |
| Staphylinidae | <i>Ontholestes tessellatus</i> (Geoffroy, 1785)     |
| Staphylinidae | <i>Othius punctulatus</i> (Goeze, 1777)             |
| Staphylinidae | <i>Oxyporus rufus</i> (Linnaeus, 1758)              |
| Staphylinidae | <i>Paederidus ruficollis</i> (Fabricius, 1777)      |
| Staphylinidae | <i>Paederus fuscipes</i> (Curtis, 1826)             |
| Staphylinidae | <i>Quedius unicolor</i> (Kiesenwetter, 1847)        |
| Staphylinidae | <i>Reichenbachia antennata</i> (Leach, 1817)        |
| Staphylinidae | <i>Rugilus rufipes</i> (Germar, 1836)               |
| Staphylinidae | <i>Rybaxis longicornis</i> (Leach, 1817)            |
| Staphylinidae | <i>Scaphidium quadrimaculatum</i> (Olivier, 1790)   |
| Staphylinidae | <i>Scaphisoma agaricinum</i> (Linnaeus, 1758)       |
| Staphylinidae | <i>Staphylinus erythropterus</i> (Linnaeus, 1758)   |
| Staphylinidae | <i>Tachinus humeralis</i> (Gravenhorst, 1802)       |
| Staphylinidae | <i>Tachinus laticollis</i> (Gravenhorst, 1802)      |
| Staphylinidae | <i>Tachinus lignorum</i> (Linnaeus, 1758)           |
| Tenebrionidae | <i>Blaps lethifera</i> (Marsham, 1802)              |
| Tenebrionidae | <i>Blaps mortisaga</i> (Linnaeus, 1758)             |
| Tenebrionidae | <i>Bolitophagus interruptus</i> (Illiger, 1800)     |
| Tenebrionidae | <i>Bolitophagus reticulatus</i> (Linnaeus, 1767)    |
| Tenebrionidae | <i>Centorus procerus</i> (Mulsant, 1854)            |
| Tenebrionidae | <i>Corticeus fasciatus</i> (Fabricius, 1790)        |



| Family        | Species                                                         |
|---------------|-----------------------------------------------------------------|
| Tenebrionidae | <i>Corticeus pini</i> (Panzer, 1799)                            |
| Tenebrionidae | <i>Corticeus unicolor</i> (Piller & Mitterpacher, 1783)         |
| Tenebrionidae | <i>Crypticus quisquilius</i> (Linnaeus, 1760)                   |
| Tenebrionidae | <i>Cteniopus sulphureus</i> (Linnaeus, 1758)                    |
| Tenebrionidae | <i>Diaperis boleti</i> (Linnaeus, 1758)                         |
| Tenebrionidae | <i>Eledona agricola</i> (Herbst, 1783)                          |
| Tenebrionidae | <i>Enoplopus velikensis</i> Piller & Mitterpacher, 1783         |
| Tenebrionidae | <i>Gnaptor spinimanus</i> (Pallas, 1781)                        |
| Tenebrionidae | <i>Gonodera luperus</i> (Herbst, 1783)                          |
| Tenebrionidae | <i>Helops caeruleus</i> (Linnaeus, 1758)                        |
| Tenebrionidae | <i>Helops coeruleus</i> (Linnaeus, 1758)                        |
| Tenebrionidae | <i>Helops rossii</i> (Germar, 1817)                             |
| Tenebrionidae | <i>Hypophloeus bicolor</i> (Olivier, 1790)                      |
| Tenebrionidae | <i>Iphthiminus italicus</i> (Truqui, 1857)                      |
| Tenebrionidae | <i>Laena viennensis</i> (Sturm, 1807)                           |
| Tenebrionidae | <i>Lagria hirta</i> (Linnaeus, 1758)                            |
| Tenebrionidae | <i>Menepphilus cylindricus</i> (Herbst, 1784)                   |
| Tenebrionidae | <i>Nalassus dermestoides</i> (Illiger, 1798)                    |
| Tenebrionidae | <i>Nalassus laevioctostriatus</i> (Goeze, 1777)                 |
| Tenebrionidae | <i>Neomida haemorrhoidalis</i> (Fabricius, 1787)                |
| Tenebrionidae | <i>Omophlus lepturoides</i> (Fabricius, 1787)                   |
| Tenebrionidae | <i>Opatrum sabulosum</i> (Linnaeus, 1761)                       |
| Tenebrionidae | <i>Palorus depressus</i> (Fabricius, 1790)                      |
| Tenebrionidae | <i>Platydema dejeanii</i> (Laporte de Castelnau & Brullé, 1831) |
| Tenebrionidae | <i>Pseudocistela ceramoides</i> (Linnaeus, 1758)                |
| Tenebrionidae | <i>Scaphidema metallicum</i> (Fabricius, 1792)                  |
| Tenebrionidae | <i>Stenomax aeneus</i> (Scopoli, 1763)                          |
| Tenebrionidae | <i>Tenebrio molitor</i> (Linnaeus, 1758)                        |
| Tenebrionidae | <i>Tenebrio obscurus</i> (Fabricius, 1792)                      |
| Tenebrionidae | <i>Trachyscelis aphodioides</i> (Latreille, 1809)               |
| Tenebrionidae | <i>Tribolium castaneum</i> (Herbst, 1797)                       |
| Tenebrionidae | <i>Uloma culinaris</i> (Linnaeus, 1758)                         |
| Trogossitidae | <i>Tenebroides mauritanicus</i> (Linnaeus, 1758)                |
| Zopheridae    | <i>Bitoma crenata</i> (Fabricius, 1775)                         |
| Zopheridae    | <i>Pycnomerus terebrans</i> (Olivier, 1790)                     |

**Table S2.** List of families found in the Central Beetles Collection together with Korlević Collection and the Redenšek Beetles Collection of the Croatian Natural History Museum with the locations where they were found.

|                     |                       |                       |
|---------------------|-----------------------|-----------------------|
| <b>Anthicidae</b>   | <b>Cleridae</b>       | <b>Mycetophagidae</b> |
| Botanički vrt       | Medvednica            | Kraljičin zdenac      |
| Cmrok               | Sv. Jakob             | Medvednica            |
| Medvednica          | Zagreb                | Trnje                 |
| Sv. Jakob           | <b>Coccinellidae</b>  | Zagreb                |
| Tuškanac            | Kraljičin zdenac      | <b>Nitidulidae</b>    |
| Zagreb              | Medvednica            | Cmrok                 |
| <b>Anthribidae</b>  | Sv. Jakob             | Medvednica            |
| Sv. Jakob           | Zagreb                | Podsused              |
| Zagreb              | <b>Cryptophagidae</b> | Sv. Jakob             |
| <b>Attelabidae</b>  | Kraljičin zdenac      | Tuškanac              |
| Lipa                | Veternica             | Zagreb                |
| Zagreb              | <b>Curculionidae</b>  | Zagreb Sava           |
| <b>Bostrichidae</b> | Zagreb                | Zelengaj              |
| Sv. Jakob           | <b>Dascillidae</b>    | <b>Nosodendridae</b>  |
| <b>Buprestidae</b>  | Maksimir              | Zagreb                |
| Cmrok               | Sv. Jakob             | <b>Oedemeridae</b>    |
| Glavica             | <b>Dermestidae</b>    | Maksimir              |
| Medvednica          | Zagreb                | Sv. Jakob             |
| Sv. Jakob           | <b>Dryopidae</b>      | Zagreb                |
| Zagreb              | Podsused              | <b>Ptinidae</b>       |
| <b>Byrrhidae</b>    | Sigečica              | Zagreb                |
| Maksimir            | Zagreb                | <b>Pyrochroidae</b>   |
| Medvednica          | <b>Dytiscidae</b>     | Zagreb                |
| Zagreb              | Podsused              | <b>Salpingidae</b>    |
| Zagreb Sava         | Zagreb                | Sv. Jakob             |
| <b>Byturidae</b>    | <b>Elateridae</b>     | Zagreb                |
| Maksimir            | Borongaj              | <b>Scarabaeidae</b>   |
| Zagreb              | Botanički vrt         | Bliznec               |
| <b>Cantharidae</b>  | Cmrok                 | Borčec                |
| Medvednica          | Gornji grad           | Borongaj              |
| Sv. Jakob           | Gračani               | Botanički vrt         |
| Zagreb              | Kraljičin zdenac      | Cmrok                 |
| <b>Carabidae</b>    | Laščina               | Donji grad            |
| Bizečka peć         | Lipa                  | Gornji grad           |
| Borčec              | Maksimir              | Gračani               |
| Cmrok               | Markuševac            | Grenešinska Dubrava   |
| Jelenovac           | Medvedgrad            | Jakuševac             |
| Kraljičin zdenac    | Medvednica            | Jazbina               |

|                         |                      |                      |
|-------------------------|----------------------|----------------------|
| Maksimir                | Mirogoj              | Josipovac            |
| Medvedgrad              | Podsused             | Kraljičin zdenac     |
| Medvednica              | Prekrižje            | Ksaver               |
| Mrzljak Zagrebačka gora | Sv. Jakob            | Maksimir             |
| Podsused                | Šašinovec            | Medvednica           |
| Sigečica                | Trnje                | Mirogoj              |
| Sv. Jakob               | Zagreb               | Podsused             |
| Tuškanac                | Zagreb Sava          | Rauchova lugarnica   |
| Veternica               | <b>Elmidae</b>       | Rebro                |
| Zagreb                  | Podsused             | Stenjevec            |
| Zagreb Sava             | <b>Endomychidae</b>  | Sv. Jakob            |
| <b>Cerambycidae</b>     | Sv. Jakob            | Šestine              |
| Baćun                   | <b>Erotylidae</b>    | Šestinski kraljevec  |
| Bidrovec                | Kraljičin zdenac     | Teškovec             |
| Bizečka peć             | Maksimir             | Trg žrtava fašizma   |
| Blato                   | Medvednica           | Trnje                |
| Botanički vrt           | Prekrižje            | Tuškanac             |
| Bukovac                 | Trnje                | Vrapče               |
| Cmrok                   | Zagreb               | Zagreb               |
| Dolje                   | Zelengaj             | Zagreb Sava          |
| Dubravkin put           | <b>Geotrupidae</b>   | Zagrebačka Dubrava   |
| Gračani                 | Sv. Jakob            | Zelengaj             |
| Grenešinska Dubrava     | Zagreb               | <b>Scirtidae</b>     |
| Jelenovac               | <b>Helophoridae</b>  | Lipa                 |
| Josipovac               | Maksimir             | <b>Scaptiidae</b>    |
| Kaptol                  | Zagreb               | Medvednica           |
| Kraljičin zdenac        | <b>Heteroceridae</b> | <b>Silphidae</b>     |
| Ksaver                  | Kraljičin zdenac     | Lipa                 |
| Lipa                    | Maksimir             | Maksimir             |
| Maksimir                | Podsused             | Sv. Jakob            |
| Markuševac              | Zagreb Sava          | Zagreb               |
| Medvedgrad              | <b>Histeridae</b>    | <b>Silvanidae</b>    |
| Medvednica              | Medvednica           | Zagreb               |
| Medveščak               | Zagreb               | <b>Staphylinidae</b> |
| Mirogoj                 | <b>Hydraenidae</b>   | Bizečka peć          |
| Podsused                | Podsused             | Cmrok                |
| Prekrižje               | Zagreb               | Jelenovac            |
| Rebro                   | <b>Hydrophilidae</b> | Kraljičin zdenac     |
| Remete                  | Kraljičin zdenac     | Maksimir             |
| Stenjevec               | Zagreb               | Sigečica             |
| Susedgrad               | Zagreb Sava          | Sv. Jakob            |
| Sv. Jakob               | <b>Leiodidae</b>     | Tuškanac             |
| Šestine                 | Sv. Jakob            | Zagreb               |

|                      |                     |                      |
|----------------------|---------------------|----------------------|
| Tomislav dom         | Veternica           | Zagreb Sava          |
| Trnje                | Zagreb              | Zelengaj             |
| Tuškanac             | <b>Lucanidae</b>    | <b>Tenebrionidae</b> |
| Veternica            | Gračani             | Botanički vrt        |
| Zagreb               | Kaptol              | Cmrok                |
| Zagreb Sava          | Kraljičin zdenac    | Gornji grad          |
| Zagrebačka Dubrava   | Maksimir            | Jelenovac            |
| <b>Chrysomelidae</b> | Medvednica          | Kraljičin zdenac     |
| Jelenovac            | Sv. Jakob           | Maksimir             |
| Kraljičin zdenac     | Trnje               | Medvednica           |
| Lipa                 | Zagreb              | Mikulići             |
| Maksimir             | <b>Malachiidae</b>  | Mirogoj              |
| Medvednica           | Kraljičin zdenac    | Sv. Jakob            |
| Podsused             | Zagreb              | Šestine              |
| Sv. Jakob            | <b>Melandryidae</b> | Trnje                |
| Zagreb               | Medvednica          | Zagreb               |
| Žitnjak              | <b>Meloidae</b>     | Zelengaj             |
| <b>Ciidae</b>        | Zagreb              | <b>Trogossitidae</b> |
| Sigečica             | <b>Monotomidae</b>  | Zagreb               |
| Zagreb               | Zagreb              | <b>Zopheridae</b>    |
|                      |                     | Jelenovac            |
|                      |                     | Sv. Jakob            |
|                      |                     | Zagreb               |
